# Supplementary material
Source: publisher site journal article supplement (https://www.dovepress.com/article/246609)
Supplement: Supplementary file 1 [file get_supplementary_file.php]

| **Table S1 The size of lung nodules at baseline, the first follow up, and the second follow up** | | | | | | | | | |
| --- | --- | --- | --- | --- | --- | --- | --- | --- | --- |
| **Scan time** | | **Benign (n=139)** | | | **Malignant (n=60)** | | | |  |
| N Missing | Mean | SD | | N Missing | Mean | SD | p-value |
| **T0** | |  |  |  | |  |  |  |  |
| long axial diameter (mm) | | 0 | 6.55 | 2.73 | | 0 | 10.94 | 8.73 | <.0001 |
| long axial diameter (mm)-M | | 52 | 4.15 | 2.85 | | 20 | 5.71 | 3.85 | 0.011 |
| short axial diameter (mm) | | 0 | 5.10 | 2.23 | | 0 | 7.80 | 6.68 | 0.003 |
| short axial diameter (mm)_M | | 52 | 2.98 | 2.53 | | 20 | 3.14 | 2.01 | 0.50 |
| **T1** |  |  |  |  | |  |  |  |  |
| long axial diameter (mm) | | 0 | 6.78 | 2.96 | | 0 | 12.95 | 9.19 | <.0001 |
| long axial diameter (mm)-M | | 54 | 4.33 | 2.87 | | 16 | 8.03 | 5.28 | <.0001 |
| short axial diameter (mm) | | 0 | 5.23 | 2.36 | | 0 | 9.62 | 7.14 | <.0001 |
| short axial diameter (mm)_M | | 54 | 3.08 | 2.49 | | 16 | 4.78 | 2.75 | <.0001 |
| **T2** | |  |  |  | |  |  |  |  |
| long axial diameter (mm) | | 0 | 6.88 | 3.13 | | 0 | 18.02 | 11.94 | <.0001 |
| long axial diameter (mm)-M | | 45 | 4.13 | 2.71 | | 10 | 12.35 | 8.88 | <.0001 |
| short axial diameter (mm) | | 0 | 5.37 | 2.46 | | 0 | 13.78 | 8.75 | <.0001 |
| short axial diameter (mm)_M | | 45 | 3.13 | 2.52 | | 10 | 8.66 | 7.22 | <.0001 |

| **Table S2 Concordance of mediastinal window categorical features** | | | | |
| --- | --- | --- | --- | --- |
| Feature | (Weighted) Kappa  (95% CI) |  | Concordance, n (%) | Discordance, n (%) |
| Distribution pattern | 1 (1 – 1) |  | 120 (100) | 0 (0) |
| Discrepancy ratio | 0.96 (0.928 – 0.991) |  | 114 (95) | 6 (5) |

**Note.** The Kappa index and the weighted Kappa index were used for nominal variables and ordinal variables, respectively.
